# Supplementary material
Source: PubMed Central journal article supplement (PMC4486263)
Supplement: NIHMS700492-supplement-suppl_figures.pdf [file NIHMS700492-supplement-suppl_figures.pdf]

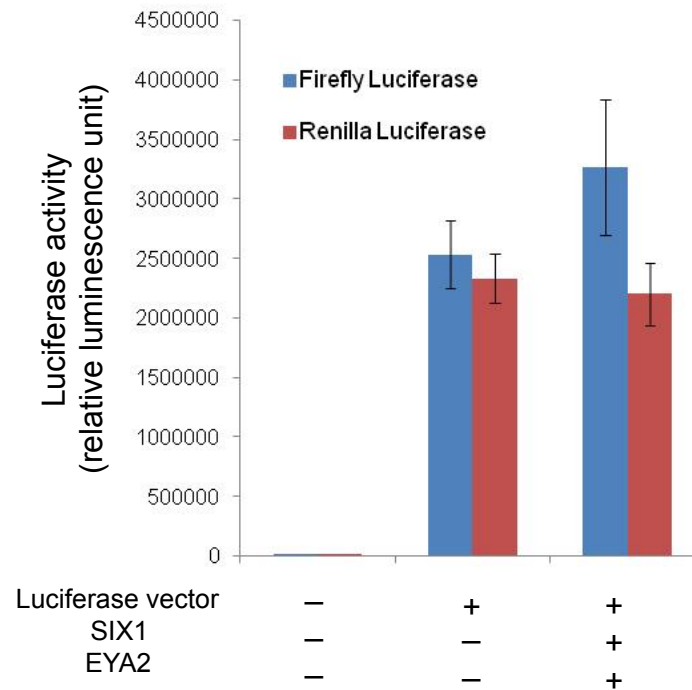

Supplementary Figure. The MEF3 reporter (firefly luciferase) is activated in H1299 cells with or without co-transfection with SIX1 and EYA2. A constitutively active *Renilla* luciferase vector is also co-transfected as a control for variations in transfection efficiency and cell numbers.
